# Supplementary material for: A fast adaptive gating system based on the reconfigurable morphology of liquid metal via an electric field on porous surfaces
Source: Royal Society of Chemistry journal article supplement (doi:10.1039/d0ta07290g), 2020-01-01
Supplement: d0ta07290g4.pdf [file d0ta07290g4.pdf]

Electronic Supplementary Information (ESI)

Fast adaptive gating system based on reconfigurable morphology of liquid metal *via* electric field on porous surfaces

Fuping Wang,<sup>a</sup> Qiuya Zhang,<sup>a</sup> Yan Li,<sup>a</sup> Di Tian,<sup>a</sup> Xiaofang Zhang,<sup>c</sup> Dongliang Tian,<sup>\* a,b</sup> and Lei Jiang<sup>a,b,d</sup>

<sup>a</sup>Key Laboratory of Bio-Inspired Smart Interfacial Science and Technology of Ministry of Education, School of Chemistry, Beihang University, Beijing 100191, P. R. China. E-mail: tiandl@buaa.edu.cn

<sup>b</sup>Beijing Advanced Innovation Center for Biomedical Engineering, Beihang University, Beijing, 100191, P. R. China

<sup>c</sup>School of Mathematics and Physics, University of Science & Technology Beijing, Beijing 100083, P. R. China

<sup>d</sup>Technical Institute of Physics and Chemistry, Chinese Academy of Sciences, Beijing 100191, P. R. China

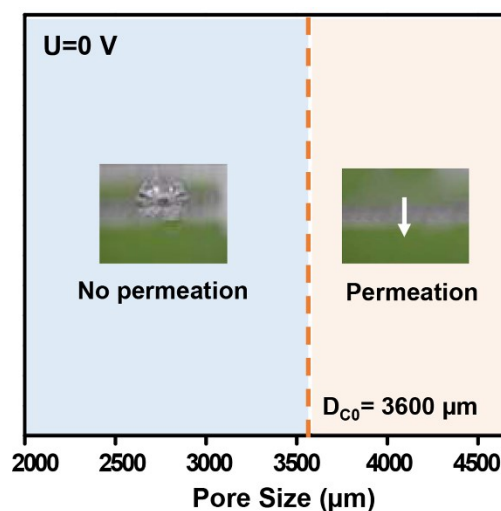

**Fig. S1** The influence of mesh pore size ( $D$ ) on LM permeation behavior on the micro/nanostructured mesh (1 mol L<sup>-1</sup> NaOH solution) without applied voltage, the critical permeation pore size ( $D_{C0}$ ) is 3600 μm. LM can permeate the mesh when  $D > D_{C0}$ , while LM cannot permeate the mesh when  $D < D_{C0}$ .

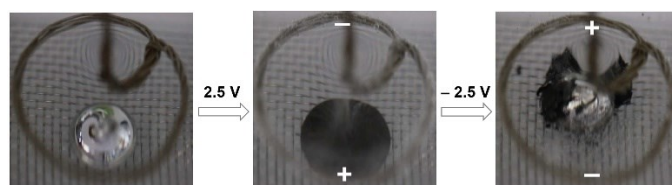

**Fig. S2** Electric field adaptive wetting and dewetting of LM droplet on the micro/nanostructured mesh in  $1 \text{ mol L}^{-1}$  KCl solution. The black oxide layer is formed on LM droplet surface when it wets the mesh surface with voltage of 2.5 V. When the voltage of -2.5 V is applied, the black oxide layer will fall off from LM surface, and LM droplet restores to a spherical shape owing to increase of the surface tension.

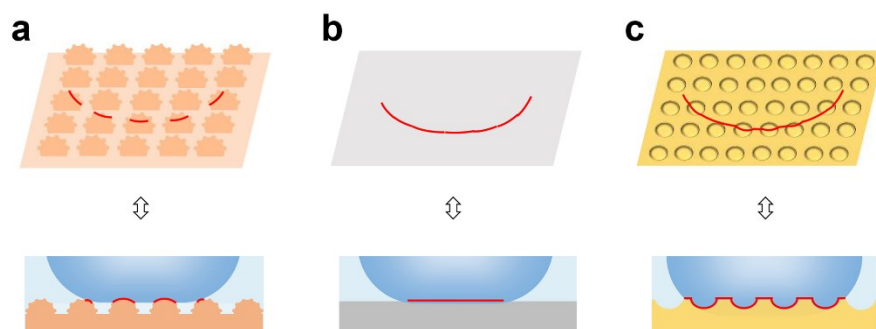

**Fig. S3** Schematic illustration of the triple-phase line of LM droplet on the surface of micro/nanostructure (a), flat structure (b) and microstructure (c). The length of the contact line ( $L$ ) between the LM droplet and the solid substrate is  $L_a < L_b < L_c$ , *i.e.*, contact area fraction of LM droplet with the micro/nanostructure, flat structure, and microstructure on the mesh satisfies  $f_1^1 < f_1^2 < f_1^3$ , which corresponds to equation (11).
